# Supplementary material
Source: PubMed Central journal article supplement (PMC5397703)
Supplement: mmc1.pdf [file mmc1.pdf]

# Supplemental Figure 1

**A** **Time**

Current procedural terminology (CPT) code set implementation for next-generation sequencing, going live on **January 1<sup>st</sup> 2015**

-3 months (Jan 1<sup>st</sup>) +6 months

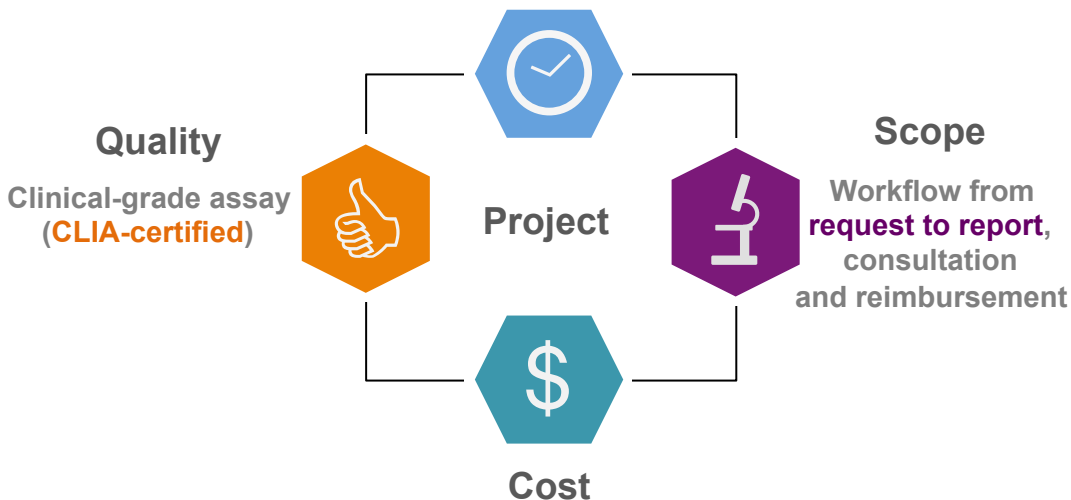

“Clinical exome/genome sequencing is at the brink of becoming a reimbursed clinical test in an **accountable healthcare** setting”

**B**

**Project Management: “Organizing the people”**

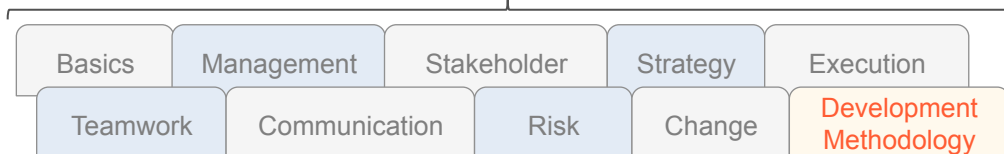

Selected competencies

“Specific way to organize the work”
