# Supplementary material
Source: PubMed Central journal article supplement (PMC5397703)
Supplement: mmc8.pdf [file mmc8.pdf]

# Supplemental Figure 8

## Preauthorization

American Medical Association      Hospital      Payor

**Provide**

- CPT
- MRN
- date Preauth

**Laboratory information system (LIS)**

CPT code set

Charge codes  
Fee schedule

Negotiate & contract

- Reimbursement monitoring
- new tests and processes
- Billing appeal management
- Supervisor of billing team

**Provide**

- MRN
- DOB
- DOS
- ICD
- CPT

Example:

| MRN   | DOB     | ICD  | DOS     | Test-Name | CPT   | Charge Code | Dept | Ins Plan   |
|-------|---------|------|---------|-----------|-------|-------------|------|------------|
| 12345 | 7/12/84 | 6.14 | 4/15/15 | ExGS      | 81415 | 800023742   | Path | INC3242334 |

In addition to a focus on reimbursement, I act as a liaison for billing questions

**Billing system**

Example:

| INST | DOS     | PAYOR | MRN   | Test-Name | CPT   | Charge Code | Charge    | ICD  |
|------|---------|-------|-------|-----------|-------|-------------|-----------|------|
| MGH  | 4/15/15 | Pay1  | 12345 | ExGS      | 81415 | 800023742   | \$1234.00 | 6.14 |

**Genetic billing Admin**

D: B.Sc. ± GC  
PG: various  
Exp: 2 years practice

## Accessioning

HL-7

## Payor

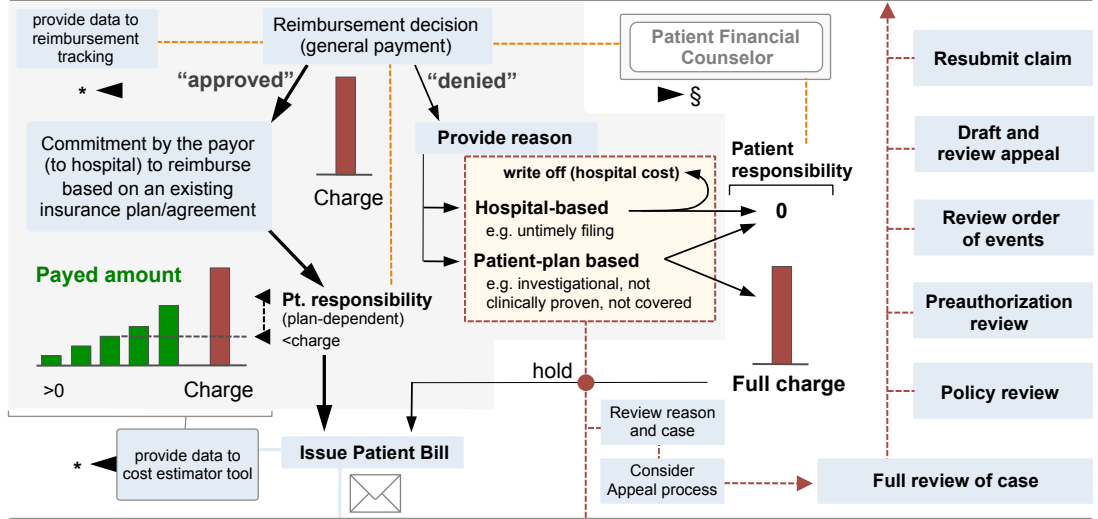

Hospital Finance Division
