# Supplementary material
Source: PubMed Central journal article supplement (PMC5397703)

# Supplemental Figure 3

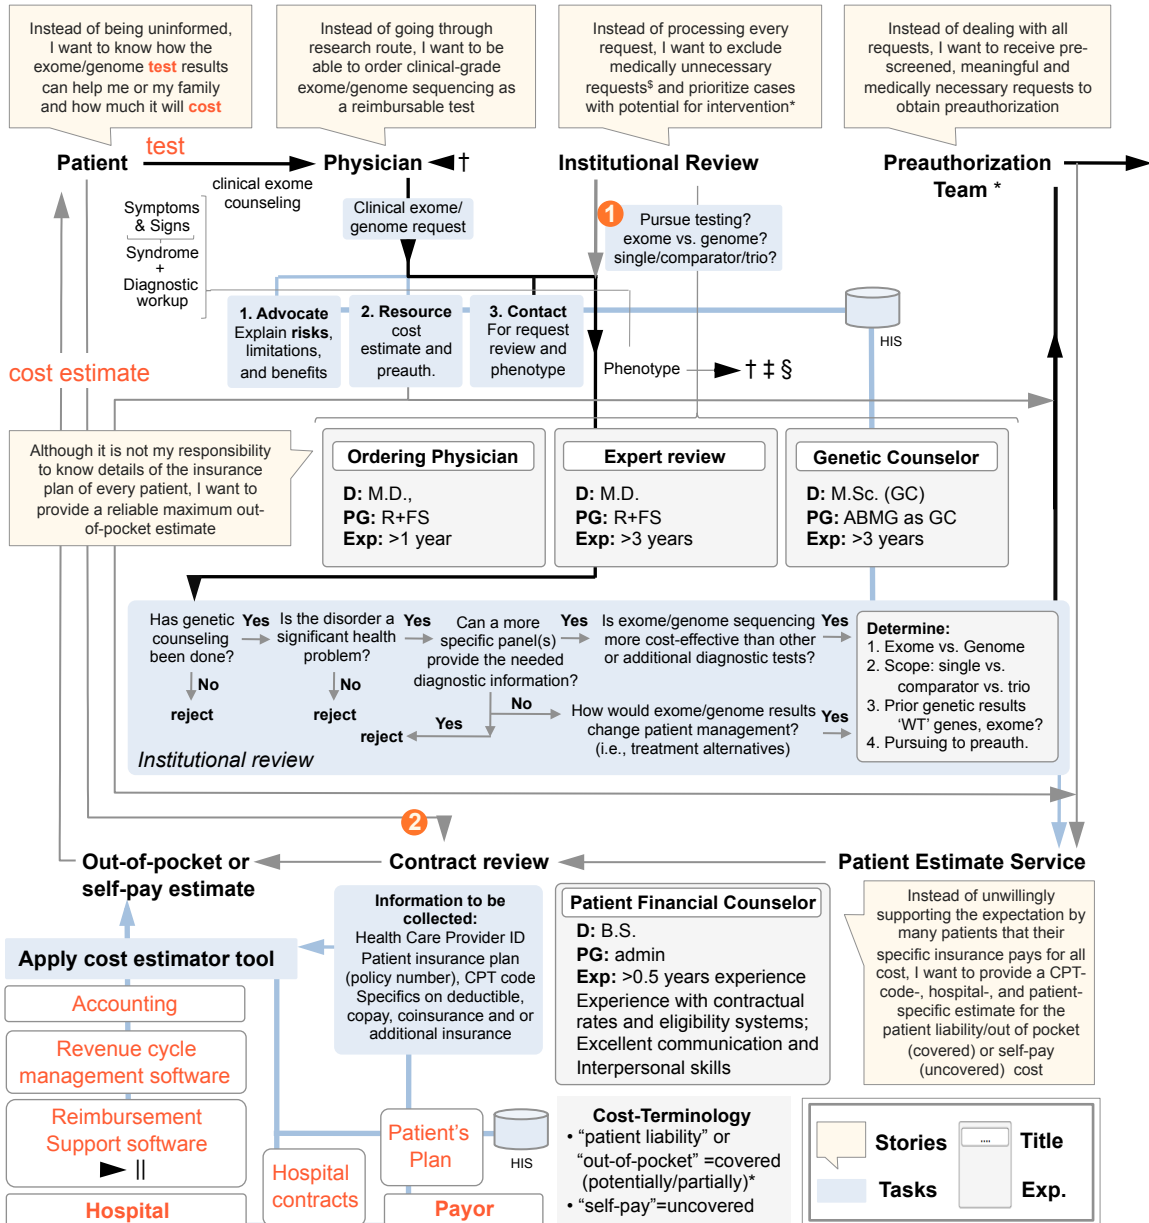

Supplement: mmc3.pdf [file mmc3.pdf]

# Supplemental Figure 6

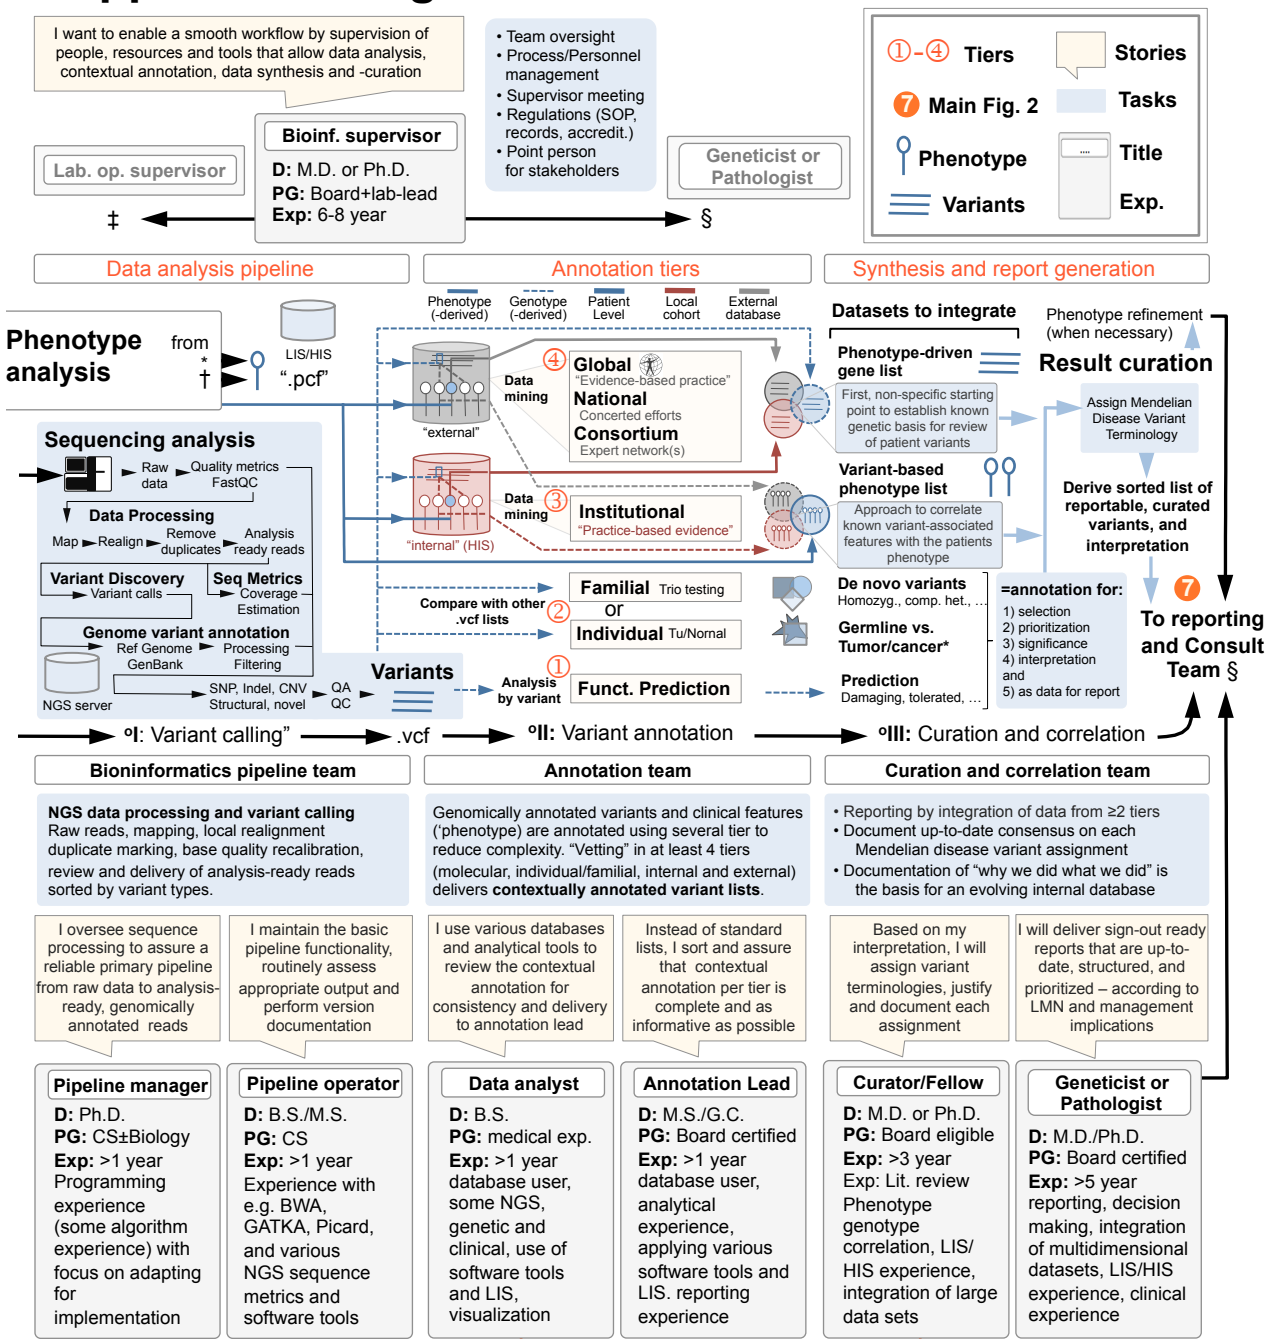

Supplement: mmc6.pdf [file mmc6.pdf]
